# Supplementary material
Source: PubMed Central journal article supplement (PMC1474788)
Supplement: mbc_E05-05-0450_1.pdf [file mbc_E05-05-0450_1.pdf]

## SUPPLEMENTAL MATERIAL

### Supplemental Materials and Methods

#### **Overproduction of *NRK2* in the background of GFP-tagged kinesin-2, Kin1p.**

We prepared a plasmid containing the *NRK2* coding region fused to the 6xHis epitope tag sequence, and inserted downstream of the MTT1 promoter and between the flanking sequences of the *BTU1* gene (pMTT1-6xHIS-NRK2). To overproduce the 6xHis-NRK2 gene in the background of tagged kinesin-2, GFP-Kin1p expressed at native level, by standard crosses between the strain CU522 and double knockout heterokaryon for two partially redundant kinesin-2 genes, *KIN1* and *KIN2* (Brown *et al.*, 1999), we constructed triple mutant heterokaryons which contain the following genotype: *btu1-K350M/btu1-K350M; kin1::neo2/kin1::neo2; kin2::bsr1/kin2::bsr1* (*btu1-K350M/btu1-K350M/btu1-K350M; KIN1*, pm-s). Two such heterokaryons were crossed and progenies homozygous for the *btu1-K30M*, *kin1::neo2*, *kin2::bsr1* alleles in the macronucleus were obtained. Previously we showed that deletion of both *KIN1* and *KIN2* led to inability to grow cilia but the resulting paralyzed cells could be grown on the enriched medium, MEPP (Brown *et al.*, 1999). We determined that the presence of the *btu1-k350M* allele in addition to the knockouts of *KIN1* and *KIN2* genes caused synthetic lethality. However, we rescued the dying progeny by biolistic transformation with a fragment encoding GFP-Kin1p (Brown *et al.*, 1999) by targeting to the homologous *KIN1* locus. The resulting cells (UG10) carry the *btu1-K350M* mutation in  $\beta$ -tubulin which confers paclitaxel sensitivity, and are motile due to the expression of GFP-Kin1p. This strain was used to introduce a BTU1-MTT1-6xHis-NRK2-BTU1 fragment into the *BTU1* locus by biolistic transformation and

selection of survivors with 20  $\mu$ M paclitaxel. In the final strain (UG11), the overexpression of 6xHis-Nrk2p can be induced by cadmium in the presence of GFP-Kin1p at its native levels.

### ***Tagging of Nrk1p and Nrk2p in native loci***

To produce fragments for tagging the *NRK1* and *NRK2* coding regions in their native loci, pMTT1-NRK1-GFP and pMTT1-NRK2-GFP plasmids were digested with BclII and EcoRV and the resulting NRK1-GFP-3'BTU1 or NRK2-GFP-3'BTU1 fragments were ligated into the pMNBL plasmid carrying the *neo3* cassette (Shang *et al.*, 2002), between the SmaI and BamHI sites. These plasmids were digested with XhoI and ApaI and 1.5 kb amplified fragments of the 3' UTR of either *NRK1* or *NRK2* were cloned into these sites to give pNRK1-GFP-3'BTU1-*neo3* and pNRK2-GFP-3'BTU1-*neo3* plasmids. The above plasmids, had the *neo3* selectable marker cassette embedded into the 3' UTR of either GFP-tagged *NRK1* or *NRK2* coding region. The inserts of pNRK1-GFP-BTU1-*neo3* and pNRK2-GFP-BTU1-*neo3* were separated by digestion with ApaI and SacI restriction endonucleases. The constructs were targeted to the native loci by biolistic transformation of starved wildtype CU428 *Tetrahymena* cells (Cassidy-Hanley *et al.*, 1997). Cells subjected to bombardment were incubated overnight in 10 mM Tris-HCl pH 7.5, and transferred to SPP medium with CdCl<sub>2</sub> (1 $\mu$ g/ml) and after 2 hrs selection with paromomycin (120  $\mu$ g/ml) was initiated.

### ***NRK1* and *NRK2* single and double germline gene knockouts**

We cloned the 4.7 kb macronuclear DNA fragment of *NRK1* flanked by SpeI and PstI sites. For the *NRK2* gene, we cloned its 4.8 kb HindIII genomic fragment. For the *NRK1* knockout, the p4T21 plasmid was digested with EcoRV and BamHI to isolate the *neo2* cassette (Gaertig *et al.*, 1994). A plasmid with the 4.7 kb genomic fragment containing *NRK1* was digested with BamHI, blunt ends were made with T4 DNA polymerase, digested with BgIII and ligated to the *neo2* fragment. As a result, 122 bp of the 5' UTR region and 1 kb of the coding region of *NRK1* were replaced by *neo2*, inserted in a reverse transcriptional orientation. To prepare a knockout plasmid construct for *NRK2*, the p4B21 plasmid (Brown *et al.*, 1999) was digested with SmaI and EcoRV to obtain a blunt-ended *bsr1* cassette. A plasmid with the 4.8 kb genomic fragment of *NRK2* was digested with NdeI to remove 1.37 kb of the *NRK2* coding region. Blunt ends were created with T4 DNA polymerase and the resulting fragment used for insertion of the blunt-ended *bsr1* cassette in a reverse transcriptional orientation. For germline transformation, the *Tetrahymena* cells of the CU428 and B2086 strains (provided by Dr. Peter Bruns, Cornell University) were induced to mate and subjected to biolistic transformation between 3-4 hrs after strain mixing as described (Cassidy-Hanley *et al.*, 1997). Bombarded cells were incubated in 50 ml of SPPA for 4 –5 hrs followed by paromomycin (120 µg/ml) or blasticidin S selection (60 µg/ml). Single and double knockout heterokaryons and homokaryons were created as described (Hai *et al.*, 1999).

### ***Immunofluorescence***

The immunofluorescence studies were done as described in the Materials and Methods of the main section except that rabbit polyclonal anti-GFP antibodies (ab6556, from Abcam) were used at the 1:600 dilution.

### **Supplemental Figure Legends**

Figure S1. Expression of Nrk1p-GFP, Nrk2p-GFP and effect of expression of NRKs on cell proliferation. A-B. Western blots showing levels of either Nrk1p-GFP (A) or Nrk2p-GFP (B) as a function of time after addition of cadmium chloride to induce the transgenes. C. Growth curves of cell populations carrying several NRK transgenes after cadmium chloride induction.

Figure S2. Left panel, immunofluorescence image with an anti-centrin 20H5 antibody of a wildtype cell prior to cytokinesis. Note the properly assembled membranelles of the new oral apparatus located below the cleavage furrow region. Middle panel, detection of NRK2p-GFP in overproducing cell prior to cytokinesis displaying a highly disorganized oral apparatus to which Nrk2p-GFP localizes. Right panel, an Nrk17p-overproducing cell arrested in cytokinesis with a cleavage furrow shifted to the anterior end (signal of Nrk17p-GFP).

Figure S3. Immunofluorescence images documenting the localizations of either Nrk1p-GFP (B-C) or Nrk2p-GFP (D-E) expressed in their native loci. The polyclonal anti-GFP

antibody (Abcam) was used and gives a slight nonspecific labeling of ciliary tips and basal bodies in cells lacking an expressed GFP (A). Nrk1p-GFP was detected in newly formed short locomotory cilia (arrows in B) and in assembling oral cilia in dividing cells (arrows in C). Nrk2p-GFP was not detected in non-dividing cells. In dividing cells, Nrk2p was detected in assembling oral cilia (arrow in D). At a more advanced stage of cell division, Nrk2p-GFP was detected in a subset of anterior and ventral cilia (arrow in D). In all cilia, there Nrk2p was more concentrated at the tips of cilia.

Figure S4. A cell which expresses a GFP tagged kinesin-2, GFP-Kin1p in the native locus and overexpresses 6xHis-Nrk2p under the MTT1 promoter, 2.5 hrs after induction with 3  $\mu\text{g/ml}$   $\text{CdCl}_2$ , labeled by immunofluorescence using anti-GFP antibodies (Abcam) (left panel) and anti-polyglutamylated tubulin antibody, ID5, that is used here as a marker of cilia (middle panel). The merged image of GFP and polyglutamylated tubulins is shown in the right panel. The magnified portions of the anterior and posterior area of the cell are shown above and below. The large arrow indicates the anterior region enriched in short cilia which have increased level of GFP-kin1p. The small arrow shows posterior cilia which do not undergo shortening and also have a significantly lower signal of kinesin-2.

Figure S5. RT-PCR shows that most if not all NRK genes of *Tetrahymena thermophila* are expressed. We performed RT-PCR to detect gene products for a total of 16 predicted NRK genes including 8 paralogs within the CNK2 subtype. For each NRK gene we performed PCR reactions using total cDNA made from RNA of vegetative cells (left lane), RNA from conjugating cells (middle lane) and genomic DNA (right lane).

Whenever possible we used gene-specific primers flanking an intron which resulted in amplification of a larger fragment using genomic DNA. Bands were produced using cDNA for all 13 sets of primers indicating that all paralogs of CNK2 type are expressed. Furthermore, the absence of an intron-containing fragment in the cDNA-based reactions indicates lack of contamination of cDNA by genomic DNA.

Figure S6. A multiple alignment of NRK kinase domain sequences. Note that for the tree construction (Fig. 1A) we did not include lineage-specific insertions. *Homo sapiens*: Nek1 (NP\_036356.1), Nek2 (NP\_002488.1), Nek3 (NP\_689933.1), Nek4 (NP\_003148.1), Nek6 (AAG13417.1), Nek7 (NP\_598001.1), Nek8 (NP\_835464.1), Nek9 (AAL87410.1), Nek11 (NP\_079076.2), aurora kinase (NP\_004208.1), cdk2 kinase (CAA43985.1), PKC1beta kinase (CAA29634.1). *Mus musculus*: CAMK kinase (NP\_598687.1). *Drosophila melanogaster*: CG17256-PA (NP\_572415.1), CG10951-PA, (NP\_651293.1). *Caenorhabditis elegans*: 1C941 (NP\_490967.1), ZC581.1 (AAB54139.1), F19H6.1 (CAA92169.2). *Chlamydomonas reinhardtii*: FA2 (AAL86904.1), Cnk1p (AAQ64682.1), Cnk2p (AAQ64683.1), Cnk3p (AAQ64684.1), Cnk4p (AAQ64685.1), Cnk5p (AAQ64686.1), Cnk6p (AAQ64687.1). *Saccharomyces pombe*: Fin1 (O13839). *Saccharomyces cerevisiae*: KIN3 (NP\_009410.1). *Aspergillus nidulans*: NIMA (EAA60031.1). *Neurospora crassa*: NIM1 (XP\_330623.1). *Crithidia fasciculata*: CfNRK (CAD38824.1). Loci ID numbers for the *T. thermophila* are: *NRK1* (10831), *NRK2* (2469), *NRK3* (18448), *NRK4* (24991), *NRK5* (19380), *NRK6* (7740), *NRK7* (19674), *NRK8* (1405), *NRK9* (17999), *NRK10* (2122), *NRK11* (28433), *NRK12* (28502), *NRK13* (3425), *NRK14* (29340), *NRK15* (29341), *NRK16* (29473), *NRK17*

(22242), *NRK18* (18676), *NRK19* (4647), *NRK20* (20809), *NRK21* (15435), *NRK22* (24902), *NRK23* (26810), *NRK24* (13547), *NRK25* (29341), *NRK26* (15734), *NRK27* (22348), *NRK28* (8589), *NRK29* (1112), *NRK30* (20296), *NRK31* (23433), *NRK32* (21625), *NRK33* (21626), *NRK34* (24670), *NRK35* (1924), *NRK36* (6348), *NRK37* (2218), *NRK38* (17542), *NRK39* (3979).

Figure S7. A partial multiple alignment of known and predicted CNK2 subfamily NRKs from various protists (Vc: *Volvox carteri*; T.pyr: *Tetrahymena pyriformis*; FN0...: *Paramecium tetraurelia*). Note the presence of conserved amino acid motifs located downstream of the kinase domain region.

### **References for supplemental materials**

- Brown, J.M., Marsala, C., Kosoy, R., and Gaertig, J. (1999). Kinesin-II is preferentially targeted to assembling cilia and is required for ciliogenesis and normal cytokinesis in *Tetrahymena*. *Mol. Biol. Cell* 10, 3081-3096.
- Cassidy-Hanley, D., Bowen, J., Lee, J., Cole, E.S., VerPlank, L.A., Gaertig, J., Gorovsky, M.A., and Bruns, P.J. (1997). Germline and Somatic Transformation of Mating *Tetrahymena thermophila* by Particle Bombardment. *Genetics* 146, 135-147.
- Gaertig, J., Gu, L., Hai, B., and Gorovsky, M.A. (1994). High frequency vector-mediated transformation and gene replacement in *Tetrahymena*. *Nucleic Acids Res.* 22, 5391-5398.
- Hai, B., Gaertig, J., and Gorovsky, M.A. (1999). Knockout heterokaryons enable facile mutagenic analysis of essential genes in *Tetrahymena*. *Methods Cell Biol.* 62, 513-531.
- Shang, Y., Song, X., Bowen, J., Corstanje, R., Gao, Y., Gaertig, J., and Gorovsky, M.A. (2002). A robust inducible-repressible promoter greatly facilitates gene knockouts, conditional expression, and overexpression of homologous and heterologous genes in *Tetrahymena thermophila*. *Proc Natl Acad Sci* 99, 3734-3739.

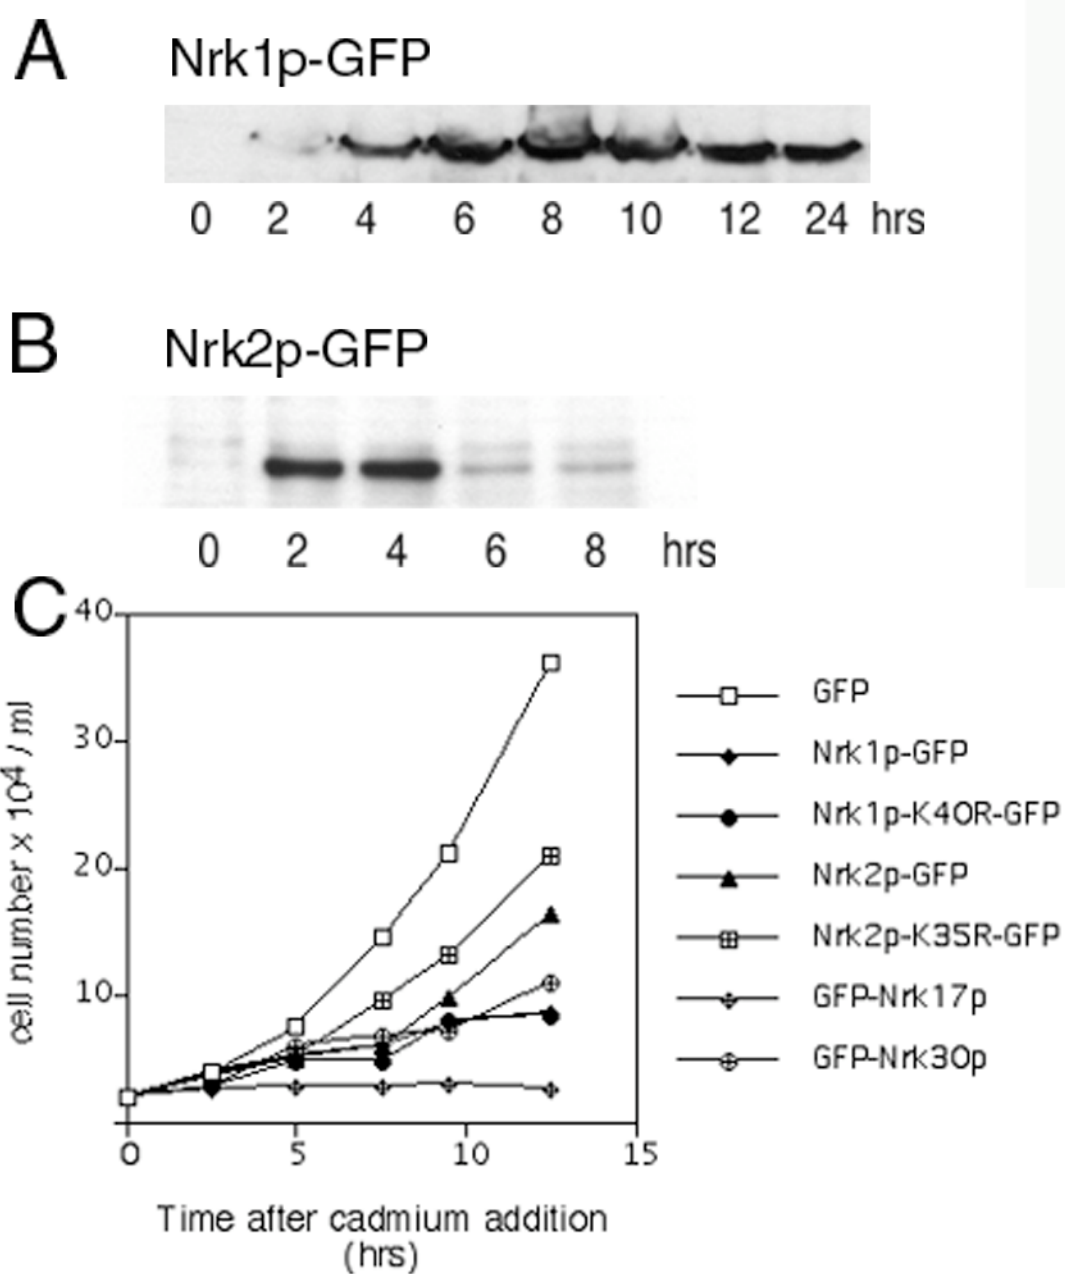

Figure S1.



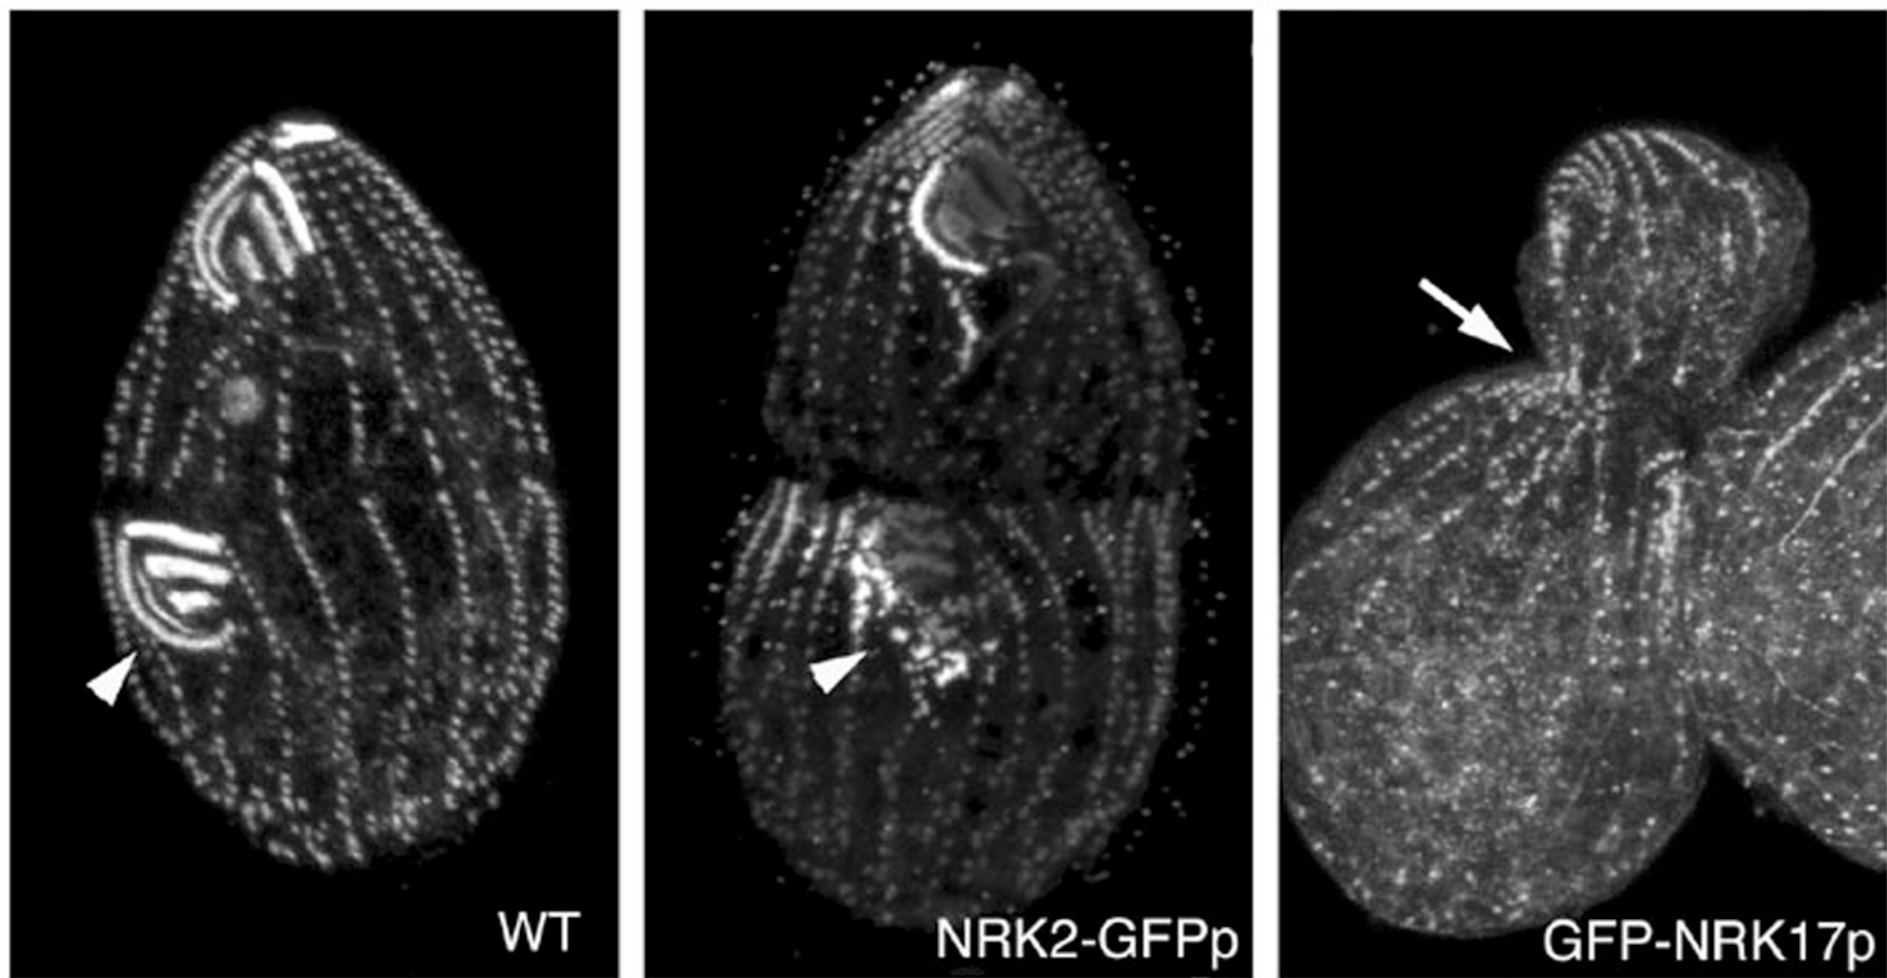

Figure S2

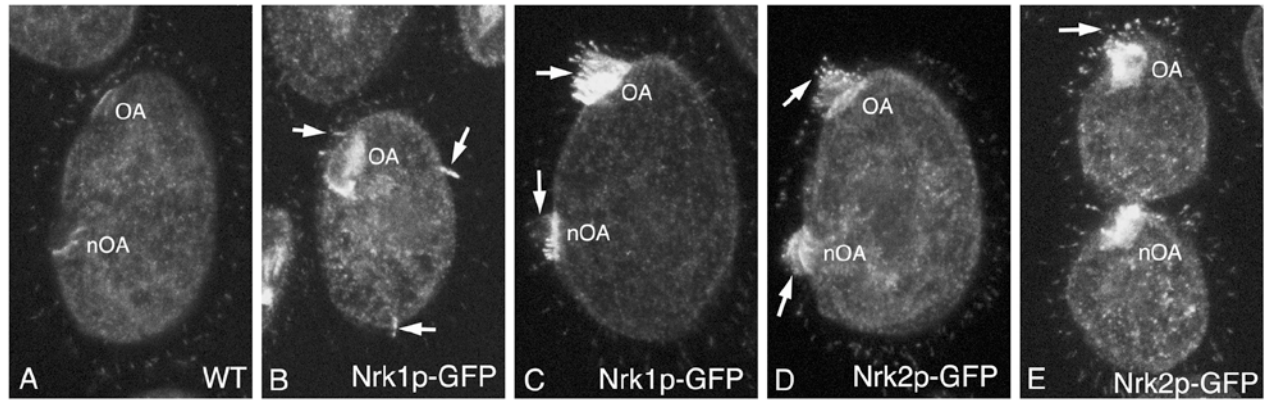

Figure S3

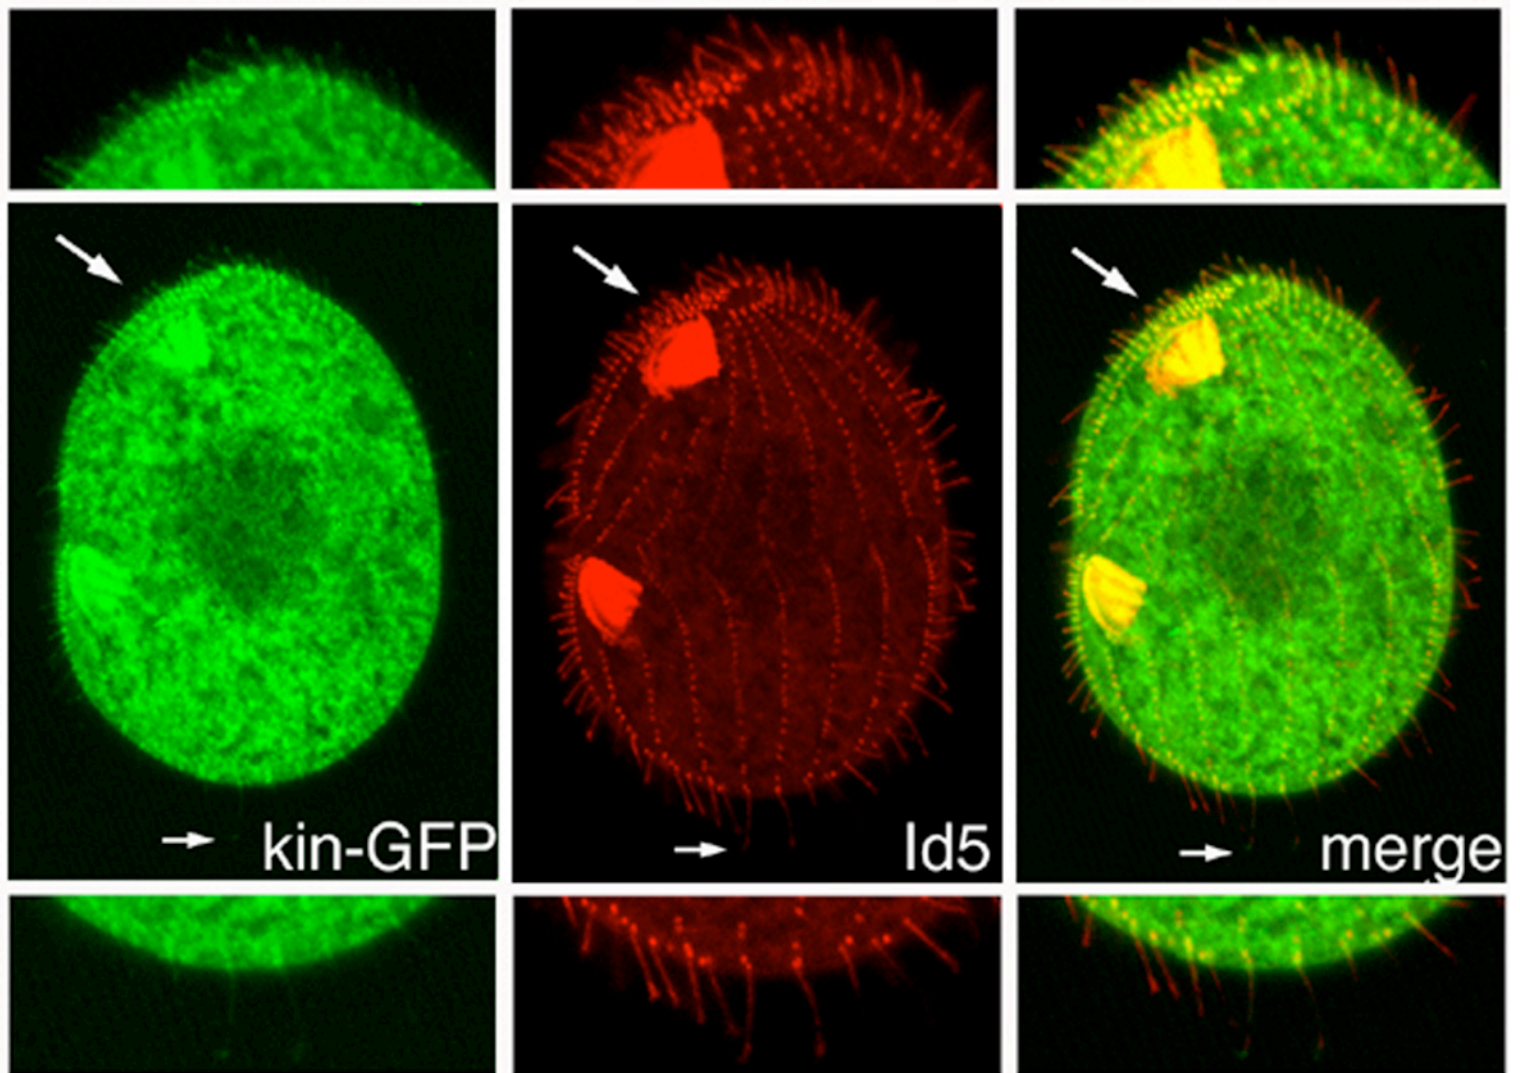

Fig. S4

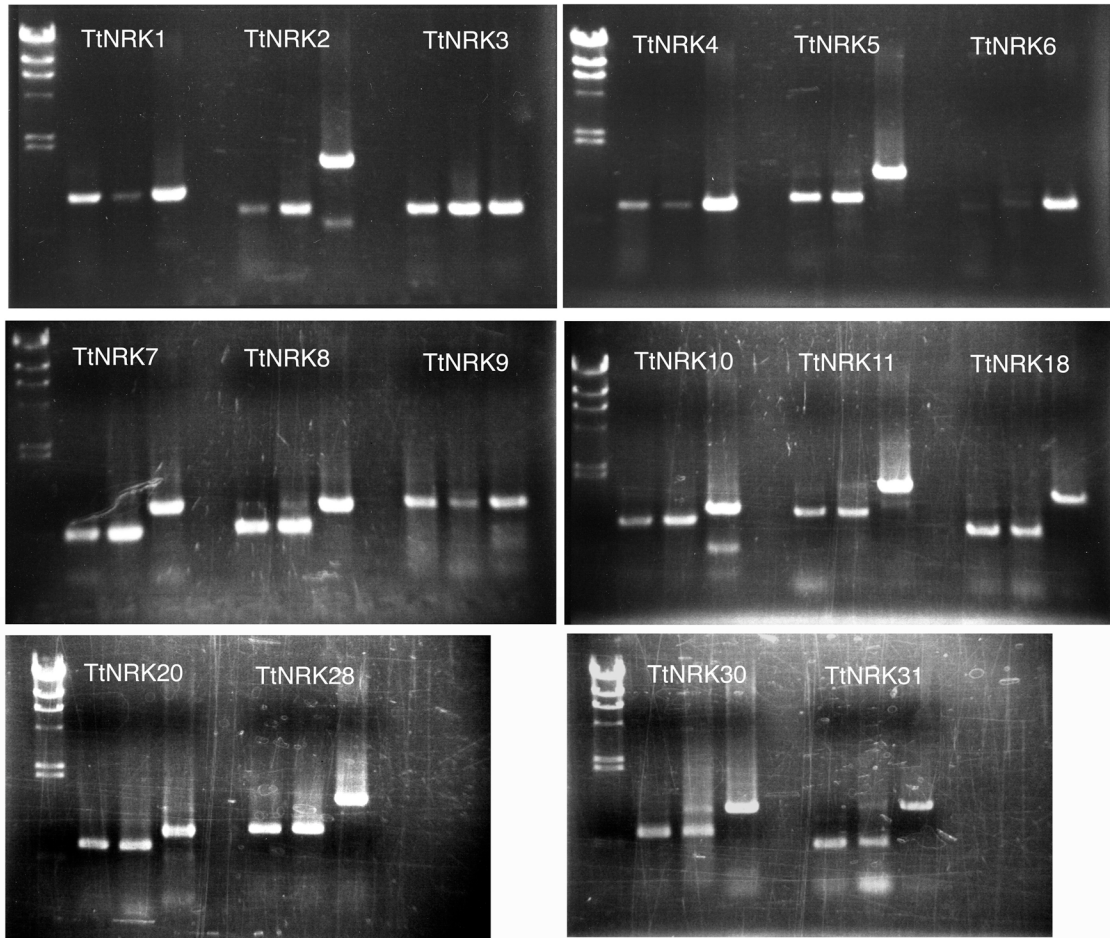

Fig. S5





Fig. S6

CLUSTAL W (1.7) multiple sequence alignment

```
NEK8-H.sapiens          YERIRVVGRGAFGIVHLCLRKADQK----LVIIKQIPVEQM-----TKEERQAAQNECOV
Nek8-2-C.elegans       YEKVRVVGRGAFGVCWLCRGKNDASHQ--KVIIKLINTHGM-----TEKEENSIQSEVNL
Nek8-1-C.elegans       YERIRTVGKGAFGSAVLYRRREDSS----LVIIKEINMYDL-----DSSQRRLALNEVSL
Nek8-similar-D.melanogaster  YEKVRVVGQGSFGIAILYRRKSDGH----QIVFKQINLSEL-----SPPGRDLAMNEVDV
NEK9- Nerccl           YIPIRVLGRGAFGEATLYRRTEDDS----LVVWKEVDLTRL-----SEKERRDALNEIVI
NRK18-T.thermophila    YEILGQIGKGSFGLVQKIKRKSDBGK----LVVWKEMNYGRM-----SEREKQQLVAEVNI
NRK20-T.thermophila    YEVIIGEIGAGQFGKVVKIKRKSNDK----ILVWKQLEYGKM-----DEKEKSQLVAEVNI
NEK2-H.sapiens         YEVLYTIGTGSYGRGQKIRRKSDGK----ILVWKELDYGSM-----TEAEKQMLVSEVNL
Nek2-similar-D.melanogaster  YEVLAVMGNGSFGTCYKVRDKSTGE----LFAWKGMNYDEL-----DEAKCDALVSEISV
NIM-1-N.crassa]       YELLEKIGHGSFGIIRKVRKADGM----ILCRKEISYLMK-----SOKEREQLHAEFSI
NIMA-A.nidulans        YEVLEKIGCGSFGIIRKVKRKSDFG----ILCRKEINYIKM-----STKEREQLTAEFNI
KIN3-S.cerevisiae_    YQVLEEIGRGSFGSVRKVIHIPTKK----LLVRKDIKYGHM-----NSKERQQLIAECSI
Fin1-S.pombe           YKILECIGHGSFGRIYKVQRLKDGK----LLAQKEIHFNGI-----TRQEKQYIADEVNI
NEK6-H.sapiens         FQIEKKIGRGQFSEVYKATCLLDRK----TVALKKVQIFEMM-----DAKARQDCVKEIGL
NEK7-H.sapiens         FRIEKKIGRGQFSEVYRAACLDDGV----PVALKKVQIFDLM-----DAKARADCIKEIDL
Nek7-similar-C.elegans  FIIIEKKIGKGQFSEVFRAOCTWVDL----HVALKKIQVFEMV-----DQKARQDCLKEIDL
NrK6-Chlamydomonas     YDVQKPVGKGGYAVVYQKIRRDDGR----VVAVKKVEIFEM-----SAKKRDRCLQEVTL
NRK1-T.thermophila     FEILKRLGEGSFGSVYQVRKSDGK----IYAMKKVKMMSL-----STKREKDALNEVRI
NRK3-T.thermophila     FNVQKTLGNGAFSWYKVQRKODGQ----VYALKKVKLREL-----SYKEKENALNEIRI
NRK2-T.thermophila     FVNQKIGEGSYSSVHKVRRISDNQ----EYALKKVKLSGL-----SEKEKDNALNEIRI
NRK31-T.thermophila    FEVISKLGEGSFSQVFQVQRKSDGM----IYAMKKVKMGLL-----KEKEKENALNEVRI
NRK4-T.thermophila     FDVIRKLGEGAYSSVFVVRKISNGQ----DYAMKNIKMGSL-----SAKEQENAINEVRF
NRK5-T.thermophila     FEILSKLGEGSFSSTVYRVRGKDGK----EYALKRIKMMKL-----NEKERENAVNEVRF
NRK7-T.thermophila     FDI IKTGEGSFAKVYKVVQRKSDGQ----SYAMKRCKIGLM-----KQRDKDNALNEVRI
NRK9-T.thermophila     FKILCKLGEGSFSSTVFVLRVLDNK----IYAMKKVQMSRL-----NEKEKGNLNEIRI
NRK6-T.thermophila     FEIIEKLGEGAYSQVYKVKRTIDQQ----IYALKKVNLTNL-----SLKEKENALNEVRI
Cnk1-Chlamydomonas     FKVHKLKGKGSYGKVKVERESDKQ----LYALKEADLGSN-----SQAERADAVNEVRL
Cnk2-Chlamydomonas     FKVLFKFLGKGSYGSVFLVQRLADSQ----TYALKEMDVRSM-----SQAEREDSINEIRL
NRK11-T.thermophila    YDNLVKLGQGSYGVVYKGRKKSDBGK----TYVIKEINMKFM-----DQKQKQDAVNEGNL
NRK17-T.thermophila    FDTLGLKLGQGSYGVVYKVRVVDGN----VYVMKQINISKM-----NSRMKQDAINEVHI
NRK8-T.thermophila     FEILKRLGQGAHGAVYKVRKDKQN----TYVLKQILAGGM-----QKQKQKCEINEAIL
FA2-Chlamydomonas     YELQY-IDKGSFGAVFKAVRKSDFG----VYALKQVDLRSADFK----NPTLDRAAAIDEAR
NrK4-Chlamydomonas     FIIIEKIGSGSYGVVFKVVRKVDKH----VYAMKEIDLQGM-----SRKEQEECIRETRV
NEK1-H.sapiens         YVRLQKIGEGSFGKAILVKSTEDGR----QYVIKEINISRM-----SSKEREESRREVAV
NEK3-H.sapiens         YMVLRMIGEGSFGALLVQHESSNQ----MFAMKEIRLPK-----SFSNTQNSRKEAVL
NRK26-T.thermophila    YTKIKVVGKGSFGYAVLVQSNTEENKK--YYVIKIIDISKM-----DRKQREEALNEVHV
NRK29-T.thermophila    YIKIELVGKGNFGLAVLVQSKINRK----YYIMKVYIFQQTIIIE--FLKFQODALNEVKF
NEK4-H.sapiens         YCYLRVVGKGSYGEVTLVKHRRDQK----QYVIKKNLNRNA-----SSRERRAAEQEAQL
NRK22-T.thermophila    YETVKLIGSGAFGQVYLVKHKREDK----MYVNKKIKTRDM-----SOKDRENTENEVRL
NRK10-T.thermophila    YRELEQIGKGTSGTVFLVKSQDKK----FYIAKKIILTNL-----NEQERQAVEQELIL
NRK30-T.thermophila    YKEIEELIGRGTQGSAMLVECRSDKK----RYVSKKVILTNL-----SEKDQNNAIQELKL
NRK13-T.thermophila    YKEIEVIGRGNFGSATLVEKLDNKK----QYIAKKIVLSSL-----NPKQODSALQEAQL
Cnk5-Chlamydomonas     YLDLTAIGQGYGTAYRAKDKYDNQ----LYCIKRIPMS-----AKDDHAGALREAQL
NEK11-H.sapiens        YVLQKLGSGSFGTVYLVSDKKAKR----GEELKVLKEISVGEL--NPNETVQANLEAQL
NRK19-T.thermophila    YKRLKLLGEGSFGKAYLVESQSDKS----KWVIKQISLDAM-----SPEEKESYKEAKI
NRK21-T.thermophila    YKRIKLLGEGAFGKAYLVEDLRTHE----LLVQKQMDMKAM-----STEEKRETQKEARI
NRK12-T.thermophila    YKQIKLLGEGSFGKAYLVECQSDGS----LCVIKMDTKSM-----TEAEKQETVREAHI
NRK27-T.thermophila    YKKIKLLGQGTYGKAFVVERKSDGL----KCVIKQIEMSHM-----TEEERKEAQKEANI
NRK15-T.thermophila    YLWIKQIGYGSQGVHLIESKEDSS----KLAIKNISTKNM-----SQQQRKHQDEYRC
NRK25-T.thermophila    YVLKKKIGQGNYGQVYLVQSQRDGS----ILAIKNISTQNM-----IFEDLEKCLKECTI
NRK14-T.thermophila    YRWIKKIGEGAYQVHLVQSIRDGS----KWAIKNIYVSG-----GEDVKKKRQSEYKI
NRK16-T.thermophila    YKVLKTLGQGASGSVELVQK-NDGN----LYALKTISMKYM-----NDTEKRSAQSEVTL
NRK24-T.thermophila    YKVMIRIGQAGGSVELVQKRSDBGQ----LFALKTISMKFM-----DDQOKKMAQOEITL
Cnk3-Chlamydomonas     YELQREIGSGSYQAVLATRLEDGM----QVVCQIRLFEM-----DDKARADTLTEAKV
NrK-C.fasciculata      YVLTTLVGRNPTTAAAFVATRGS DPSE---KVVAKFVMLN-----DDKQATYARSELHC
```

CAMKK-M.musculus

YDFRDVLGTGAFSEVILAEDKRTQK----LVAIKCIAKKAL-----EGKEGSMENEIAV

NEK8-H.sapiens LKLLNHPNVIEYYENFLEDK-----ALMIAMEYAPGGTLAEFIOKRC-----  
Nek8-2-C.elegans LKKVQHPLIIGYIDSFIMDN-----QLGIVMQUYAEGGTLERLINDQR-----AI  
Nek8-1-C.elegans LSRIEHPNIIAYYDSFEEEG-----VLMIMEYADGGTLAQMLSRTO-----  
Nek8-similar-D.melanogaster FSKLHHPNIVSYLGSFIKDN-----LLIEMEYADGGTLAQIIAERO-----  
NEK9- Nerccl LALLQHDNIIAYYHFMNDNT-----TLLIELEYCNGGNLYDKILRQK-----  
NRK18-T.thermophila IRELKHPNIVRYDDRIIEKKDT---KIYIIMEYCEGGDVGTLLKCKK-----  
NRK20-T.thermophila LREIRHPNVVRYDDRIIDKQNO---HIYIIMEYCEGGDLAAFLKLNK-----  
NEK2-H.sapiens LRELKHPNIVRYDDRIIDRTNT---TLYIVMEYCEGGDLASVITKGT-----  
Nek2-similar-D.melanogaster LRQLQHPNIVQYYHHLVNREAK---SVYIVMECCAGGDLAQIVQAR-----  
NIM-1-N.crassa] LSTLRHPNIVGYHREHLKATQ---DLHLYMEYCGNGDLGRVIRNLI-----  
NIMA-A.nidulans LSSLRHPNIVAYYHREHLKASQ---DLYLYMEYCGGDLMSVVKLNK-----  
KIN3-S.cerevisiae\_ LSQKHNENIVEFYNWDFDEQKE---VLYLYMEYCSRGDLSQMIKHYK-----  
Fin1-S.pombe LRNLKHPNIVQYCGEELNRSQA---VINLYMEYCGHGDLANLIQRYK-----  
NEK6-H.sapiens LKQLNHPNIIKYLDSFIEDN-----ELNIVLELADAGDLSQMIKYFK-----  
NEK7-H.sapiens LKQLNHPNVIKYASFIEDN-----ELNIVLELADAGDLSRMIKHFK-----  
Nek7-similar-C.elegans LKQLNHPNIVIRYASFIENN-----QLNIVLELAEAGDMSRMIKHFK-----  
Cnk6-Chlamydomonas LQQLDHPNIIQMLDAFIDEN-----MLIIIFEWAPAGDLKRLIKKTA-----  
NRK1-T.thermophila LASIKSDNIIISYKEAFYDEKSS---TLCIIMEFATKGDVLOQISEKK-----  
NRK3-T.thermophila LASINSPHIIRYKDAFYDNASG---CLCIVMEYAENGDLMAKLQDYK-----  
NRK2-T.thermophila LASIAHPNMIAYKDAFFDESSH---SLCIVMELAVNGDLSKKIDSAS-----  
NRK-31-T.thermophila LASLNDEFIVGYKEAFIDEQSQ---ILCVVMEYAAGGDLQGITANI-----  
NRK4-T.thermophila LASLSSQEIIGYKEAFYDEKGT---LLHIIMEYCEGGDLNKNIRNLK-----  
NRK5-T.thermophila LASINCRNIIISYKQAIYDEGVN---QLCVIMEYAAGGDLARIIRHAS-----  
NRK7-T.thermophila LASIKNQYVIAYKEAIYDEQSE---CLFVIMEYAAGGDLHQVQKSCI-----  
NRK9-T.thermophila LASIKCDHIIIEYRDSFFDDQSD---TLCIVMEYAGSGDLLQKLKEYKLINEKLLLEDGQNE  
NRK6-T.thermophila IASIRHPNVVVFKEFSLSDGGE---FLYLVMEYADDGDVLEKIKKHI-----  
Cnk1-Chlamydomonas LVSITHHNVIRYNEAFLGN-----KLCTVMEYAPFGDLRYIISKGA-----  
Cnk2-Chlamydomonas LASVNHPNVVCYNEAFLDGN-----RLCIVMEYAADGDLAKVIKKQO-----  
NRK11-T.thermophila LKHLESPPYVVKYDMFIEQN-----DLYIVMEFCENGDLLOYIKKQK-----  
NRK17-T.thermophila LSKLNNPYVVKYDYSFVQDN-----LLCIVMEYCDSDGDLSSFIKSQL-----  
NRK8-T.thermophila LNKLNSPYVRYDYSFLENN-----QLCIVMEYCEQGDLENFIVKNQM-----  
FA2-Chlamydomonas MLAQLNHPHIVIRHFESFVDEGEG---KLNILMEYASKGSVRQLVKSYSR-----  
Nr4-Chlamydomonas LSSLDSDFIIRYDYSFLEKG-----KLYIITEYAANGNLHDYIKKQK-----  
NEK1-H.sapiens LANMKHPNIVQYRESFEENG-----SLYIVMDYCEGGDLFKRINAQK-----  
NEK3-H.sapiens LAKMKHPNIVAFKESFEAEG-----HLYIVMEYCDGGDLMOKIKQK-----  
NRK26-T.thermophila LKAMKHPYIITYRESFIEKR-----CLCIVMEYAQGGDLTYTKIAQK-----  
NRK29-T.thermophila LKELGHPFIIAYRESFVQKDR---YLCIVMDYCEEGDLYNQIIEQK-----  
NEK4-H.sapiens LSQKHPNIVTYKESWEGGDG---LLYIVMGFCEGGDLRYKLEKQK-----  
NRK22-T.thermophila LQKLRHANIVAYKDSYMDREQ---YLNIVMIHCEGGDMHNRIKNQK-----  
NRK10-T.thermophila LKKLKHPHIVGYKENFLEPY---YMIIMEYCEQGDLSFHIKQKL-----  
NRK30-T.thermophila LREMHPNIVKFIIESYKEKN-----KVIIIMEYCEYGDLSOLIKQK-----  
NRK13-T.thermophila LKDLNHNKIVSYIESFKEED---LLIIMEYCEHGDLAFHIKRRK-----  
Cnk5-Chlamydomonas LDSDLHPNIIRYRESFVQKDG---SLCIVTSFCEEGDLFNRIKKA-----  
NEK11-H.sapiens LSKLDHPAIVKFHASFVEQD-----NFCIITEYCEGRDLDDKIQEYK-----  
NRK19-T.thermophila LEQLNHPNIVKFKEIYKTKSG---KLCIVMEYADGGDLSQKIQKQR-----  
NRK21-T.thermophila LQQLNHPNIVKFKDVYTTKKG---KLCIVMEYADGGDLAKVVKDAR-----  
NRK12-T.thermophila LEALNHPNIVKFKREYKTKK---ALCIVMDFCDGGDLAKKIQDYK-----  
NRK27-T.thermophila LQMLNHNIIKYHEQYKTKKG---RLCIVMDYAEGGDLNQVITKAR-----  
NRK15-T.thermophila LQKLDH--IVKFKKAIHCINNQ---MIQIIMEYTEGGDLQKAIKQOI-----  
NRK25-T.thermophila LQKLDNPHIVKFKKAINQPNKQ---MIYIMMEYAEGGDLRKKIKQK-----  
NRK14-T.thermophila LKKLDPNPHIIFKFAINRYRNOQ---LIQIIMEYTDGGDLEKLEKQK-----  
NRK16-T.thermophila LKVLVAPTIIRYYEAFVQND-----SIYIVMEYAKEGALSDDKIQEHK-----  
NRK24-T.thermophila LKVLVAPSIIRYYESFVEND---SIHIIMEYAKEGALSDDKITEHK-----  
Cnk3-Chlamydomonas LAQFNHVNIVHYEYCVLESG---VLNIVMEYANGGDLAAAIQRRQ-----  
Nr4-C.fasciculata LAACTHFGIVKHYDDFKSED-----KLLIIMEYGS GGDLNKOIKQRL-----

CAMKK-M.musculus

LHKIKHPNIVALDDIYESGG-----HLYLIMQLVSGGELFDRIVEKG-----

NEK8-H.sapiens -----NSLLEEETILHFFVQIILLALHHVHTH-----L  
Nek8-2-C.elegans KDSNMREYFPEKTVLDYFTQIILIALNHMHQK-----N  
Nek8-1-C.elegans -----NLLDEEQIGDMMIQMCSAVAYLHEN-----S  
Nek8-similar-D.melanogaster ----GKLHFPERYIIIAVFEQISSAINYMHSE-----N  
NEK9- Nerccl1 -----DKLFEEMVWVYLFQIVSAVSCIHKA-----G  
NRK18-T.thermophila ---KEKDYIAEDVIWKIFTQIILLALNECHNR-----PQGK  
NRK20-T.thermophila ---KEKETIPEEAIWRIFMQIVLALHEIHKK-----K  
NEK2-H.sapiens ---KERQYLDEEFVLRVMTQLTLALKECHRR-----SDGGHT  
Nek2-similar-D.melanogaster ---SQRQRFEEPIWRVLFQLCRALQVCHNK-----IPNGT  
NIM-1-N.crassa] ---KNNQYAEESFVWSIFSQLVTALYRCHYG--VDPPEVGKTVLGLGSTARPKPPSGGMT  
NIMA-A.nidulans ---RTNKYAEEDFVWRILSQLVTALYRCHYG-TDPAEVGSNLLGPAPKPSGLKKGQAQMT  
KIN3-S.cerevisiae\_ ---QEHKYIPEKIVWGILAQLLTALYKCHYG-----VELPTLTTIYDRMKPPVKGKNI  
Fin1-S.pombe ---EEKRFTQEVLKFFTQQLLALYRCHYG-----ENAPACDSQWPREIFHPKQS  
NEK6-H.sapiens ---KQKRLIPERTVWKYFVQLCSAVEHMHSR-----R  
NEK7-H.sapiens ---KQKRLIPERTVWKYFVQLCSALEHMHSR-----R  
Nek7-similar-C.elegans ---KGGRLIPEKTIWKYFVQLARALAHMHSK-----R  
Cnk6-Chlamydomonas ---EQGKTLDEPSIWTLFYQVTDGLRYMHQH-----R  
NRK1-T.thermophila ---KKHSYFEENLIWKYAADMLLGLKSLHDM-----K  
NRK3-T.thermophila ---KRNMFMDEAKIWKYAAQIILLGLKSLHDL-----K  
NRK2-T.thermophila ---KRNSFVPEEEIWTVALHMLRGLKAMHSK-----K  
NRK-31-T.thermophila ---KSKTMFPESEVWKALIHMSKGLQILHQM-----Q  
NRK4-T.thermophila ---KKNQYLDEKVVWLYIIQMIKGLKCLHDL-----N  
NRK5-T.thermophila ---KAGKYIEEDMIWSYAIQMTIGIKALHDL-----N  
NRK7-T.thermophila ---KSKTYLDENQIWIWTIQMLYGLKALHDL-----K  
NRK9-T.thermophila TSESQMVMFDEELIWDYFIQCLKGLKCLHDL-----K  
NRK6-T.thermophila ---RTGTRLREDYIWSVFIQSVKGLQVLHSL-----N  
Cnk1-Chlamydomonas ---KLRTPFPEEAVWRIFLQCKGLQALHSQ-----N  
Cnk2-Chlamydomonas ---MMKRPLPEDMIWKYFIQVVMGLQALHSM-----K  
NRK11-T.thermophila -----NQFINENKIWLFFLOMLLGLHSIHQQ-----K  
NRK17-T.thermophila -----GRPLQEMKIWKYFIMSCMGLDYIHRK-----K  
NRK8-T.thermophila -----GRPLVEKKIWKFFFQIAEGLLELHTR-----N  
FA2-Chlamydomonas -----GRPLPEEGVWRIFIQTLIGLSYLHSK-----K  
Cnk4-Chlamydomonas -----SR-LTEDLIWKLYIQIILLGLNHMHSK-----K  
NEK1-H.sapiens -----GVLFOEDQILDWVFIQICLALKHVHDR-----K  
NEK3-H.sapiens -----GKLFPEDMILNWFTQMCCLGVNHIHKK-----R  
NRK26-T.thermophila ---EKGQLFSEKQIIDWVFMALAIKHVHDR-----K  
NRK29-T.thermophila ---KTGQGFTEQQILEWVFIQICFGLKFIHDR-----R  
NEK4-H.sapiens -----GQLLPENQVVEWVFIQIAMALQYLHEK-----H  
NRK22-T.thermophila -----GKNFPEDQIQDWLAQMALALFYLHEK-----K  
NRK10-T.thermophila ---KENDHFPENIILNWFIQLTMALDFIHEK-----H  
NRK30-T.thermophila ---AKGEQIEESIILQWFIQICSALSFIHSK-----K  
NRK13-T.thermophila ---QKKEYFPEMLIVNWFYELALSIKYIHEK-----K  
Cnk5-Chlamydomonas ---AAKEYFTEDEVMMFVQIASAISYIHSK-----R  
NEK11-H.sapiens ---QAGKIFPENQIIEWFIQILLGVDMYHER-----R  
NRK19-T.thermophila -----GKYFKEEQILDWFTQICLAMKHVHDR-----K  
NRK21-T.thermophila -----GKYLQEKQILDWFTQICLAMKHVHDR-----K  
NRK12-T.thermophila -----GKFIPENQILDWFTQICLALKHIHDR-----K  
NRK27-T.thermophila -----SN-IPPEQILNWLLOMSLALNYVHNK-----N  
NRK15-T.thermophila ---QIGKPFEEEEQILDWFAQICQGLKYIHEN-----K  
NRK25-T.thermophila ---QTGKLFEEQILDWFIQICLGLKYIHKH-----K  
NRK14-T.thermophila ---QSAKPFEEKILDFFIQICLGLDCIHKH-----K  
NRK16-T.thermophila ---TKGIRIDEETILYFTAQIVIALFFMHQK-----K  
NRK24-T.thermophila ---QKGIPIDEETVLYFTAQIIISVLFMHSK-----N  
Cnk3-Chlamydomonas ---AEKKPYSEDEIMFWVFIQIVLALYHVHGR-----N  
Nrk-C.fasciculata ---KEHLPFOEYEVGLLFYQIVLALDEVHTR-----R



CAMKK-M.musculus

-----FYTERDASRLIFQVLDAVKYLHDL-----G

|                             |                                                            |
|-----------------------------|------------------------------------------------------------|
| NEK8-H.sapiens              | ILHRDLKTQNILLDKHRMV-----VKI                                |
| Nek8-2-C.elegans            | IVHRDLKPQNILMNRKTV-----LKL                                 |
| Nek8-1-C.elegans            | VLHRDLKTANVFLTRDSF-----VKI                                 |
| Nek8-similar-D.melanogaster | ILHRDLKTANVFLNRRGI-----VKI                                 |
| NEK9- Nerccl                | ILHRDIKTLNIFLTKANL-----IKL                                 |
| NRK18-T.thermophila         | ILHRDLKPANIFLDAQNN-----IKL                                 |
| NRK20-T.thermophila         | IMHRDLKPANIFLDSKNN-----AKL                                 |
| NEK2-H.sapiens              | VLHRDLKPANVFLDGKQN-----VKL                                 |
| Nek2-similar-D.melanogaster | ILHRDIKPANIFLDAAGN-----AKL                                 |
| NIM-1-N.crassa]             | ILHRDLKPENVFLGEDNS-----VKL                                 |
| NIMA-A.nidulans             | ILHRDLKPENIFLGSNT-----VKL                                  |
| KIN3-S.cerevisiae_          | VIHRDLKPGNIFLSYDDSDYNINEQVDGHEEVNSNYRDRVNSGKRGSPMDYSQVVVKL |
| Fin1-S.pombe                | VLHRDIKPANIFLDENNS-----VKL                                 |
| NEK6-H.sapiens              | VMHRDIKPANVFITATGV-----VKL                                 |
| NEK7-H.sapiens              | VMHRDIKPANVFITATGV-----VKL                                 |
| Nek7-similar-C.elegans      | IMHRDIKPANVFITGNGI-----VKL                                 |
| Cnk6-Chlamydomonas          | IMHRDIKPANVLVGANGA-----LKL                                 |
| NRK1-T.thermophila          | ILHRDLKGANVFIAEDGS-----LRL                                 |
| NRK3-T.thermophila          | ILHRDLKCANIFLGANNK-----VKL                                 |
| NRK2-T.thermophila          | ILHRDLKCANVFISKQDE-----YKI                                 |
| NRK-31-T.thermophila        | ILHRDLKCANVFLSLEGV-----YKL                                 |
| NRK4-T.thermophila          | ILHRDFKCANIMLTRDHKN-----LKL                                |
| NRK5-T.thermophila          | ILHRDLKAANVFLDKYQTR-----AML                                |
| NRK7-T.thermophila          | ILHRDLKCANIFLDSRRN-----AKI                                 |
| NRK9-T.thermophila          | IVHRDLKCANIFIGDNNI-----IKI                                 |
| NRK6-T.thermophila          | IYHRDIKCANFLYKDGTT-----TKI                                 |
| Cnk1-Chlamydomonas          | IIHRDIKPANIFLCANDL-----LKI                                 |
| Cnk2-Chlamydomonas          | ILHRDIKPGNIMVFDNGV-----AKI                                 |
| NRK11-T.thermophila         | VLHRDFKTMNIFLTKNSTE-----IRI                                |
| NRK17-T.thermophila         | ILHRDIKAMNIFLNKDDS-----LRI                                 |
| NRK8-T.thermophila          | ILHRDIKTMNLFITGNEQ-----IRI                                 |
| FA2-Chlamydomonas           | IIHRDIKSANLFIDAYDN-----IKI                                 |
| Cnk4-Chlamydomonas          | ILHRDIKTLNVFLDEDLN-----VKL                                 |
| NEK1-H.sapiens              | ILHRDIKSNIFLTKDGT-----VQL                                  |
| NEK3-H.sapiens              | VLHRDIKSKNIFLTQNGK-----VKL                                 |
| NRK26-T.thermophila         | ILHRDLKTQNIFLNAKGD-----IKI                                 |
| NRK29-T.thermophila         | ILHRDLKTQNIFLTKSKQ-----IKI                                 |
| NEK4-H.sapiens              | ILHRDLKTQNVFLTRTNI-----IKV                                 |
| NRK22-T.thermophila         | ILHRDLKTQNIFL-KSGR-----VRL                                 |
| NRK10-T.thermophila         | VLHRDVKSSNIFLTSSGS-----IKL                                 |
| NRK30-T.thermophila         | VIHRDIKSSNIFLTKSNC-----VKI                                 |
| NRK13-T.thermophila         | ILHRDIKTSNIFITRDGT-----IKI                                 |
| Nrk5-Chlamydomonas          | VLHRDLKTQNIFIAKGGI-----IKL                                 |
| NEK11-H.sapiens             | ILHRDLKSKNVFL-KNNL-----LKI                                 |
| NRK19-T.thermophila         | ILHRDLKGQNIFLTSQNI-----CKL                                 |
| NRK21-T.thermophila         | IIHRDLKGQNIFLTRNHI-----VKL                                 |
| NRK12-T.thermophila         | IVHRDLKTQNIFLMKDNA-----LKV                                 |
| NRK27-T.thermophila         | IIHRDIKAQNVFLSANNI-----VKL                                 |
| NRK15-T.thermophila         | IIHRDIKPANLFLTAQNT-----VKI                                 |
| NRK25-T.thermophila         | IIHRDIKPENIFLTADNR-----VKI                                 |
| NRK14-T.thermophila         | IIHRDIKPANIFLTAFGQ-----LKI                                 |
| NRK16-T.thermophila         | ILHRDIKSNLFLTKENV-----VKL                                  |
| NRK24-T.thermophila         | ILHRDIKTNLFLTKENI-----VKL                                  |
| Cnk3-Chlamydomonas          | VLHRDLKSNIFIAEGNL-----LKL                                  |
| Nrk-C.fasciculata           | MMHRDLKSANIFLMPTGI-----IKL                                 |

CAMKK-M.musculus

IVHRDLKPENLLYSLDEDSK-----IMI

NEK8-H.sapiens GDFGISKILSSKS-----KAYTVVGTPCYISPELCEGKPYNQKSDI WALGCVLYELASLK  
Nek8-2-C.elegans SDFGISKELGTKS-----AASTVIGTPNYLSPEICESRPYNQKSDMWSLGC VLYELLQLE  
Nek8-1-C.elegans GDFGISKIMGTETLAQ--GAKTVVGTPTYYSPEMCSGVSYNEKSDMWALGCILYEMCCLK  
Nek8-similar-D.melanogaster GDFGISKIMNTKI-----HAQTVLGTPTYYSPEMCEGKEYDNKSDI WALGCVLYELASLK  
NEK9- Nerccl GDYGLAKKLNSEYS----MAETLVGTPTYYSPELCOGVKYNFKSDI WAVGCVIFELLTLK  
NRK18-T.thermophila GDFGLSRVMGEQSE----FADTHVGTPTYYSPEQIEENKYNEKSDI WACGCLLYELGALS  
NRK20-T.thermophila GDFGLSKKLSDETK----FAYTNVGTPTYYSPEQIEENKYNEKSDI WACGCLLYELGALS  
NEK2-H.sapiens GDFGLARILNHDTSD----FAKTFVGTPTYYSPEQMNRMRSYNEKSDI WSLGCLLYELCALM  
Nek2-similar-D.melanogaster GDFGLARMLRRDQS----FAASFVGTPTYYSPELVKGRKYDRKSDV WAVGCLVYEMCALR  
NIM-1-N.crassa] GDFGLSKVMQSHD----FASTYVGTPTYYSPEICAAEKYTLKSDI WSLGCI IYELCARE  
NIMA-A.nidulans GDFGLSKLMHSHD----FASTYVGTPTYYSPEICAAEKYTLRSDI WAVGCI MYELCQRE  
KIN3-S.cerevisiae\_ GDFGLAKSLETSIQ----FATTYVGTPTYYSPEVLMDQPYSP LSDI WSLGCVIFEMCSLH  
Fin1-S.pombe GDFGLSKLLDNTRV----FTQSYVGTPTYYSPEIIRSSPYS AKSDVWALGCVIFEICMLT  
NEK6-H.sapiens GDLGLGRFFSSETT----AAHSLVGTPTYYSPEIRIHENGYNFKSDI WSLGCLLYEMAALQ  
NEK7-H.sapiens GDLGLGRFFSSETT----AAHSLVGTPTYYSPEIRIHENGYNFKSDI WSLGCLLYEMAALQ  
Nek7-similar-C.elegans GDLGLGRFFSSETT----AAHSLVGTPTYYSPEIRIHENGYNFKSDI WSLGCLLYEMAALQ  
Cnk6-Chlamydomonas GDLGLGRQLSEQTM----EAFSKVGTPTYYSPEVVRGAGYDWSKSDV WSMGCLLYELACL  
NRK1-T.thermophila GDLNVSKVQKRD----LAYTQTGTPTYYSPEVWQNPYDSKCDV WSLGCVLYEIVTLE  
NRK3-T.thermophila GDLNVSKIMKRD----FAYTQTGTPTYYSPEVWQNPYDSKCDV WSLGCVLYEIVTLE  
NRK2-T.thermophila GDLNVSKVAKRG-----LVYTQTGTPTYYSPEVWRDEPYDSSSDI WSGFCILYELAALN  
NRK-31-T.thermophila GDLNVSKVAKKG-----LVYTQTGTPTYYSPEVWRDEPYDVKSDI WSLGCVLYEMCALK  
NRK4-T.thermophila GDLNVSKVAKKG-----MLYTQTGTPTYYSPEVWRDKPYNSKSDV WSLGCVIYELVSLN  
NRK5-T.thermophila GDLNVSKKLVQNG-----LLYTQTGTPTYYSPEVWKDKPYNNKSDI WSLGCVIYEMCALK  
NRK7-T.thermophila GDLNVSKITQAN-----LARTQVGTPTYYSPEVWKDQMYNNKSDI WSLGCVIYELCAQK  
NRK9-T.thermophila GDLNVSKVTRRPEQ----MAKTQTGTPTYYSPEVWKGLSYNYKSDV WSLGCVIYELSAQK  
NRK6-T.thermophila GDFNVSKQAKMG-----LLYTQTGTPTYYSPEVWSDQPYTSSSDI WSLGCVLYELATLS  
Cnk1-Chlamydomonas GDLGIAKALTSMN-----FARTQIGTPCYMAPEVWVSGRPYSYSSDM WSLGAVLYEMMTFR  
Cnk2-Chlamydomonas GDLGIAKLLTKTA-----AAKTQIGTPHYMGPEIWKNRPYSYTSDT WAI GCLLYELAALA  
NRK11-T.thermophila GDLGVAKYLGDTNN----LAKTMVGTPTYYSPEICEEKPYNEKSDI WSLGCVLYELCTFK  
NRK17-T.thermophila GDLGVAKVLSQDN----FASTMVGTPTYYSPEMCEEKPYNEKSDI WSLGCVLYELCTYR  
NRK8-T.thermophila GDLGVAKVLSQDN----FASTMVGTPTYYSPEMCEEKPYNEKSDI WSLGCVLYELCTYR  
FA2-Chlamydomonas GDFGIARSLGASSN----LAQTLGTPTYYSPELCEGKPYNQKSDI WSLGCVLYELCTYR  
Cnk4-Chlamydomonas GDMGVAKILSTNTV----FAKTIVGTPTYYSPELCEGKPYNEKSDI WSLGCVLYELCTYR  
NEK1-H.sapiens GDFGIARVLNSTVE----LARTCIGTPTYYSPEICENKPYNNKSDI WSLGCVLYELCTYR  
NEK3-H.sapiens GDFGSARLLSNPMA----FACTYVGTPTYYSPEIENKPYNNKSDI WSLGCVLYELCTYR  
NRK26-T.thermophila GDFGIARVLQHTYD----CAKTAIGTPTYYSPEICQEKPYNQKSDI WSLGCVLYELCTYR  
NRK29-T.thermophila GDFGI--VLQNTCE----MAKTAIGTPTYYSPEICQ--PYNQKTDI WSLGCVLYELCTYR  
NEK4-H.sapiens GDLGIARVLENHCD----MASTLIGTPTYYSPELFSNKPYNKSDI WSLGCVLYELCTYR  
NRK22-T.thermophila GDFGIKAVLDSTRD----FANTCIGTPTYYSPELFSNKPYNKSDI WSLGCVLYELCTYR  
NRK10-T.thermophila GDFGISKVLHSTAD----KAQTLIGTPTYYSPEVCENKPYTYQSDI WSLGCVLYELCTYR  
NRK30-T.thermophila GDFGISKVLENSMD----KANTLVGTPTYYSPEVCENKPYTYQSDI WSLGCVLYELCTYR  
NRK13-T.thermophila GDFGISKVLENTDS----VANTVGTPTYYSPEVCESKPYTYKSDI WSLGCVLYELCTYR  
Cnk5-Chlamydomonas GDFGISKVLENTDS----VANTVGTPTYYSPEVCESKPYTYKSDI WSLGCVLYELCTYR  
NEK11-H.sapiens GDFGVSRLLMGSCD----LATTTLGTPTYYSPEALKHQGYDTKSDI WSLGCVLYELCTYR  
NRK19-T.thermophila GDFGIARVLNKTVE----KAKTMVGTPTYYSPEIINSVPYSYKSDV WSLGCVLYELCTYR  
NRK21-T.thermophila GDFGIARVLSKTVE----KAKTMVGTPTYYSPEIINSVPYSYKSDV WSLGCVLYELCTYR  
NRK12-T.thermophila GDFGIARVLRHTRE----NCKTMVGTPTYYSPEILEAKPYSFSDI WSLGCVLYELCTYR  
NRK27-T.thermophila ADFGIARILSCTKD----KAQTFIGTPTYYSPELVNSDPYTTKADI WSLGCVLYELCTYR  
NRK15-T.thermophila GDFGVAKVLENTDS----FANTVGTPTYYSPELFSNKPYNKSDI WSLGCVLYELCTYR  
NRK25-T.thermophila GDFGISKVLENTDS----VANTVGTPTYYSPEVCESKPYTYKSDI WSLGCVLYELCTYR  
NRK14-T.thermophila GDFGVSKELENTDS----VANTVGTPTYYSPEVCESKPYTYKSDI WSLGCVLYELCTYR  
NRK16-T.thermophila GDFGISKALGTNAD----FTKTLVGTPTYYSPEVCAGQSYGDKADI WSLGCVLYELCTYR  
NRK24-T.thermophila GDFGISKALGTNAD----FTKTLVGTPTYYSPEVCAGQSYGDKADI WSLGCVLYELCTYR  
Cnk3-Chlamydomonas GDFGIARVLNSDTE----LARTVIGSPTYYSPEICEDRPYNNKSDI WSLGCVLYELCTYR  
Nrk-C.fasciculata GDFGFSKQYNDVSLD--VGSSFCGTPTYYSPELWERKRYSKKAD MWSLGVLYELCTYR

CAMKK-M.musculus

SDFGLSKMEDPGS-----VLSTACGTPGYVAPEVLAQKPYSKAVDCWSIGVIAIYILLCGY

NEK8-H.sapiens  
Nek8-2-C.elegans  
Nek8-1-C.elegans  
Nek8-similar-D.melanogaster  
NEK9- Nerccl  
NRK18-T.thermophila  
NRK20-T.thermophila  
NEK2-H.sapiens  
Nek2-similar-D.melanogaster  
NIM-1-N.crassa]  
NIMA-A.nidulans  
KIN3-S.cerevisiae\_  
Fin1-S.pombe  
NEK6-H.sapiens  
NEK7-H.sapiens  
Nek7-similar-C.elegans  
Cnk6-Chlamydomonas  
NRK1-T.thermophila  
NRK3-T.thermophila  
NRK2-T.thermophila  
NRK-31-T.thermophila  
NRK4-T.thermophila  
NRK5-T.thermophila  
NRK7-T.thermophila  
NRK9-T.thermophila  
NRK6-T.thermophila  
Nrk1-Chlamydomonas  
Cnk2-Chlamydomonas  
NRK11-T.thermophila  
NRK17-T.thermophila  
NRK8-T.thermophila  
FA2-Chlamydomonas  
Cnk4-Chlamydomonas  
NEK1-H.sapiens  
NEK3-H.sapiens  
NRK26-T.thermophila  
NRK29-T.thermophila  
NEK4-H.sapiens  
NRK22-T.thermophila  
NRK10-T.thermophila  
NRK30-T.thermophila  
NRK13-T.thermophila  
Cnk5-Chlamydomonas  
NEK11-H.sapiens  
NRK19-T.thermophila  
NRK21-T.thermophila  
NRK12-T.thermophila  
NRK27-T.thermophila  
NRK15-T.thermophila  
NRK25-T.thermophila  
NRK14-T.thermophila  
NRK16-T.thermophila  
NRK24-T.thermophila  
Cnk3-Chlamydomonas  
Nrk-C.fasciculata

RAFEAA---NLPALVVKIMSGTFAPIS--DRYSPELRQLVLSLLSLEPAQ---RPPLSHI  
RAFDGE---NLPAIVMKITRSKQNPGLG--DHVSNDVKMLVENLLKTHTDK---RPDVSQ  
KAFEGD---NLPALVNSIMTCAYTPVK--GPYSAEMKMVIRELLQLDPOK---RPSAPQA  
KTFAAS---NLSELVTKIMAGNYTPVP--SGYTSGLRSLMSNLLQVEAPR---RPTASEV  
RTFDAT---NPLNLCVKIVQGI RAMEVDSSQYSLELIQMVHSCLDQDPEQ---RPTADEL  
PPFEAT---NHLSLAIKIKSGKFERLP--LRYSEELQKLIESMVHIDPEK---RPSVQNI  
PPFPAT---NHLALAMKIKNGKFERLS--KQYSDELMRVLSWCLQKNSEN---RPSVDDL  
PPFTAF---SQKELAGKIREGKFRIRIP--YRYSDELNEIITRMLNLKDYH---RPSVEEI  
PPFRGR---AFDQLSEKIAQGEFSRIP--AIYSTDLQEIIFMLAVDHEQ---RPGIEVI  
PPFNAK---THYQLVQKIKEGKIAPLP--SVYSGELFATIKDCLRVNPDH---RPDTATL  
PPFNAR---THIQLVQKIREGKFAPLP--DFYSELKNVIASCLRVNPDH---RPDTATL  
PPFQAK---NYLELQTKIKNGKCDTVP--EYYSRGLNAIIHSMIDVNLRT---RPSTFEL  
HPFEGR---SYLELQRNICQGNLSCWD--HHYSDDVFLLRHCLLEVNSDL---RPTTYQL  
SPFYGDKM-NLFSLCQKIEQCDYPLPG--EHYSEKLRRELVSMCICDPHQ---RPDIGYV  
SPFYGDKM-NLYSLCCKKIEQCDYPLPS--DHYSEELRQLVNMICINPDPEK---RPDVTYV  
SPFYGDKM-NLYSLCCKKIENGEYPLPA--DIYSTQLRDLVSRCLPEAK---RPETSEV  
SPFMEGA-NLYDVVQKISKGEYSPPLA--DQFSAPLRSLVGRMLQIDPAK---RPELEEV  
PPFKGT---SMEDLYKRVLRGNFSPINL--QRYSSDIQKFIKRVPEPKM---RSSVESL  
PPFEAK---SMEELYKKVCKGTYQKLP--KQYSQEMNDFINLCLRNPKQ---RPSVNSL  
PPFRAK---DMEGLYKKVQKGI FFERIP--QRYSNLQKFIALCLQVSSVQ---RPSVTQL  
PPFRAN---DMEGLYKKVQKGFERIP--KKYSEDLQRMLTMLLKVNPKD---RPSCEQI  
PPFKAQ---DMEGLFKKVQKQYDPIIP--SWYSQDLTDFLSLCLQVNPKM---RLTTSEL  
PPFKGK---DMEDLFKKVQKQYDPIIP--SHFSKELNLFIAQLLRVNPEQ---RPNCEI  
PPFLAS---DMPSLFKKIKGKIYERIP--SRYSELNLI SQCLNINQIT---RPDCDQL  
HPFKGN---TIEGLFTNIMKGQYERIP--SFYSEELAFVISQCLLQNPKL---RPGCDQL  
PPFNGE---SMKELYGKIMSGVYKKIS--PKYSLELSNMVSNMLQIDPKK---RFSCSQI  
TPMEGR---TMADLRNRKIKGGRYTPIPA--GRYSAELTNICHSLLATDPAK---RPSPTSI  
VPFEAR---SMSELRYKVLRGTYPPPIIP--NTFSRDLQOMVRECLDPNPKD---RPTMDQI  
HPFEAS---NQGALVIKILKNKVEPLP--SMYSRELOSIIISLLLTCKDHQK---RPDTTTL  
HPFEAQ---NQGALVLRIRGKYNPIIP--TSYSKDLVSMVMDCLCKDYKK---RPNARDI  
RPFEAT---NQGSLVLKIQKQYIPIS--SNYSPQLHRLIELCLTKEHQK---RYSIKQL  
YFPDVENN--NQVALRKIARGVFKPVS--GPYTQQLIQLITSLCLTLDPHQ---RPDPTAL  
HPFDAD---NQGALILKILRGKFPVPS--G-YSPDICDLIKRCLTQANR---RPNTYKL  
HAFEAG---SMKNLVLKIIISGSFPVPS--LHYSYDLRSLVSLFKNRPRD---RPSVNSI  
HPFQAN---SWKNLILKVCQGCISPLP--SHYSYELQFLVKQMFKNRPSH---RPSATTL  
HAFDAN---SMKGLVLKILRGTYPPPIIP--EQYSQDLRDLISEMLIKDPTQ---RPSIRKI  
HAFDAK---HQOGLVLKILKGNYPSP--NCYSPQLSDLIGEMLQRHPAK---RPSVKKI  
HAFNAK---DMNSLVYRIIEGKLPAMP--RDYSPELAELIRTMLSKRPEE---RPSVRSI  
HAFDAQ---SLNGLAVKIMNGTYPPIN--STYSKSLRDLIGKMLQLNPKS---RPSILDI  
HPFVSE---SLMALVVKIIREPNPNIP--NMYSDDLNLVNLILLAKKPES---RPRTKQI  
HPFQSN---SLMSLVMKIATEKAPKIP--QNYSLMTNGFIRSLLOKIQIPEK---RPSAQDI  
HAFESN---NLLGLIFKIVQONISDIP--SFYSKELNDLIQKLLNKNEQE---RPVINDI  
HAFAAD---SLLSLVYQIVRGNFPIPT--DQFSNGLSDLVNRLLRDPAT---RPSLSEV  
HAFAGS---NFLSIVLKIVEGDTPLP--ERYPKELNAIMESMLNKNPSL---RPSAIEI  
PPFQGE---SLQNLALNIVKGQYQPIIP--NIYSQDLKKLVSNLLQNRPEP---RYSIQQI  
PPFNAD---SLHFLALKIVKGQYSPPIIP--THFSKEMKNLVSNLLQVDAIR---RPSINDI  
PPFDGI---GLSNLALKIVKGVYAPIS--SYYSKDMTQLISLILLNVDPK---RPQVQI  
PPFEAD---NIPSLMIKISRQGFPIIP--QIYSKELRYLVNEMLTVDHNO---RPSALQI  
PPFNWS---CEAGLYYKSKNLPYPIIQ--AKYSKLLKELISKLLRKSPPD---RYTLQEI  
PPFNWS---NEYIIYYKYKPYPIITQ--AQYSPQLKTLISKLLIKSPEGGRYTTLEQI  
PPFDQW---NEANLYCKIKKKPYPIIAQ--LYYSGKLTLSKLLRKCPE---RYTLKQI  
RPFDCS---NINTLFTMIRQDPSPLH--DNCSTDIRMLITLMLNKDPLK---RPFIDWL  
RPFNDN---NLNIFLNKIRFEAPPPLH--ENTSTEIRMLITFMLQKDPVK---RPSVWDL  
RAFDGQ---SLPALVVKILRGKYPPVP--TRYSTPLRGLIESMLKQNPDK---RPSADAI  
RPFKGP---SQREIMQOVLYGKYDPPF--CPVSASMKALLDPLLSKDPED---RPTTQOL

CAMKK-M.musculus

PPFYDENDAKLFEQILKAEYEFDSPYW--DDISDSAKDFIRHLMKDPK---RFTCEQA

|                             |                  |
|-----------------------------|------------------|
| NEK8-H.sapiens              | MAQPLCI-----     |
| Nek8-2-C.elegans            | LSDPLV-----      |
| Nek8-1-C.elegans            | LKML-----        |
| Nek8-similar-D.melanogaster | LVYWI-----       |
| NEK9- Nerccl                | LDRPLL-----      |
| NRK18-T.thermophila         | LELPQI-----      |
| NRK20-T.thermophila         | LNLPQI-----      |
| NEK2-H.sapiens              | LENPLI-----      |
| Nek2-similar-D.melanogaster | IRHPLV-----      |
| NIM-1-N.crassa]             | LNLPIV-----      |
| NIMA-A.nidulans             | INTPVI-----      |
| KIN3-S.cerevisiae_          | LQDIQIRTAR-----  |
| Fin1-S.pombe                | LRSPIL-----      |
| NEK6-H.sapiens              | HQVAKQMHIWM----- |
| NEK7-H.sapiens              | YDVAKRMHAC-----  |
| Nek7-similar-C.elegans      | LQVAEHMNNYF----- |
| Cnk6-Chlamydomonas          | WTI-----         |
| NRK1-T.thermophila          | LNHKCIM-----     |
| NRK3-T.thermophila          | LEFQGLL-----     |
| NRK2-T.thermophila          | LNNVLL-----      |
| NRK-31-T.thermophila        | LSNPVQRNGGE----- |
| NRK4-T.thermophila          | LETPY-----       |
| NRK5-T.thermophila          | LKFSVI-----      |
| NRK7-T.thermophila          | LNLPII-----      |
| NRK9-T.thermophila          | LKLP-----        |
| NRK6-T.thermophila          | LQLPYKI-----     |
| Cnk1-Chlamydomonas          | L-----           |
| Cnk2-Chlamydomonas          | L-----           |
| NRK11-T.thermophila         | LSNSSN--IL-----  |
| NRK17-T.thermophila         | LQTSNYSIL-----   |
| NRK8-T.thermophila          | LTDPGK-----      |
| FA2-Chlamydomonas           | L-----           |
| Nrk4-Chlamydomonas          | L-----           |
| NEK1-H.sapiens              | LEKGF I-----     |
| NEK3-H.sapiens              | LSRGIV-----      |
| NRK26-T.thermophila         | LEKDFL-----      |
| NRK29-T.thermophila         | LEKQFL-----      |
| NEK4-H.sapiens              | LRQPYI-----      |
| NRK22-T.thermophila         | INTSFV-----      |
| NRK10-T.thermophila         | LSFPFV-----      |
| NRK30-T.thermophila         | LNNQNI-----      |
| NRK13-T.thermophila         | LNDI-----        |
| Cnk5-Chlamydomonas          | FKL-----         |
| NEK11-H.sapiens             | LKIPYL-----      |
| NRK19-T.thermophila         | LGLPFI-----      |
| NRK21-T.thermophila         | MKMPII-----      |
| NRK12-T.thermophila         | LKLPII-----      |
| NRK27-T.thermophila         | LGRFF-----       |
| NRK15-T.thermophila         | LDEPFI-----      |
| NRK25-T.thermophila         | LNEPLI-----      |
| NRK14-T.thermophila         | FDESLI-----      |
| NRK16-T.thermophila         | VNIPII-----      |
| NRK24-T.thermophila         | AKIPII-----      |
| Cnk3-Chlamydomonas          | LKSDFV-----      |
| Nrk-C.fasciculata           | LQTEFM-----      |

CAMKK-M.musculus

LQHPWI-----
